# Supplementary material for: High pregnancy rates in humpback whales (Megaptera novaeangliae) around the Western Antarctic Peninsula, evidence of a rapidly growing population
Source: R Soc Open Sci. 2018 May 2;5(5):180017. doi: 10.1098/rsos.180017 (PMC5990787; doi:10.1098/rsos.180017)
Supplement: Electronic supplementary material table header page [file rsos180017supp1.xlsx]

## Sheet: Header
					The following supplement accompanies the article
					High pregnancy rates in humpback whales (Megaptera novaeangliae)
					around the Western Antarctic Peninsula, evidence of a rapidly growing population
					Logan J. Pallin*, C. Scott Baker, Debbie Steel, Nicholas M. Kellar, Jooke Robbins,
					David W. Johnston, Doug P. Nowacek, Andrew J. Read, Ari S. Friedlaender
					*Corresponding author: lpallin@ucsc.edu
					Royal Society Open Science : Submitted 1/4/2017
Contents (table names)	Description
Table S1	Data associated with sample collection and genetic information
	Table ESM-1: Data from individuals sampled along the Western Antarctic Peninsula, including genetic sex and genotype
Table S2	Data associated with blubber hormone evaluations for pregnancy state.
	Table ESM-2: Estimates of the probability of pregnancy based on blubber progesterone concentrations from female humpback whales of unknown pregnancy status biopsied along the Western Antarctic Peninsula.
